# Supplementary material
Source: PubMed Central journal article supplement (PMC2946207)

Type of file: figure

Label: 5

Filename: 59827\_FigureS1.tif

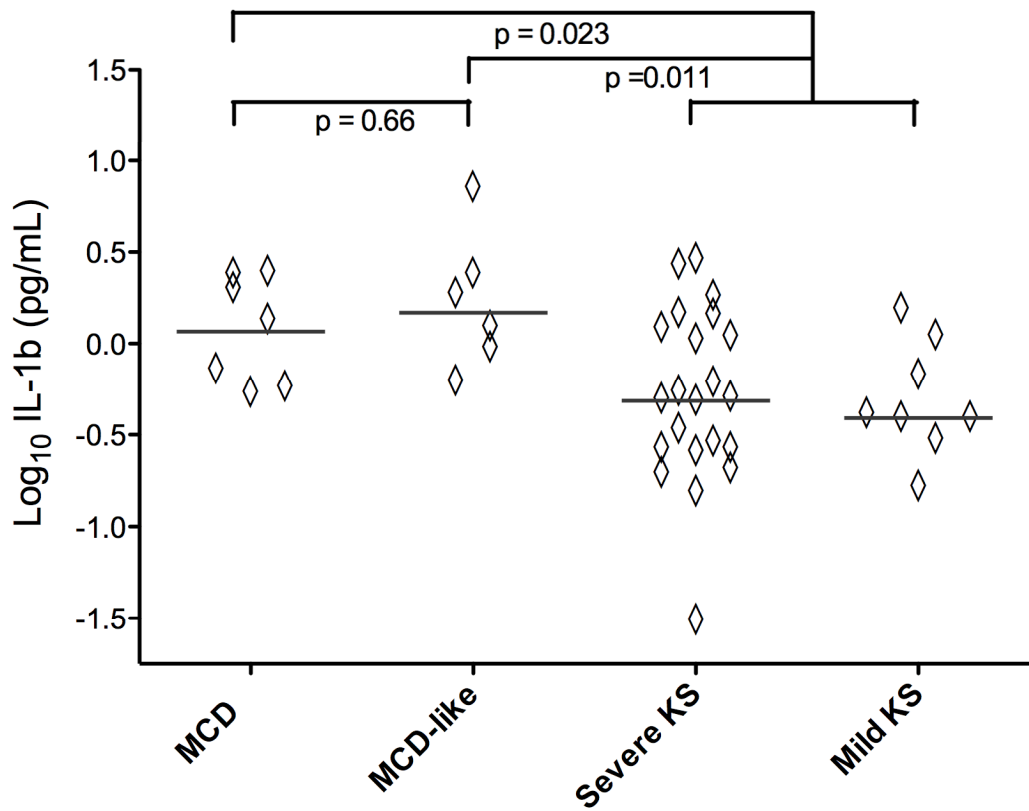

Type of file: figure

Label: 6

Filename: 59827\_figureS2.tif

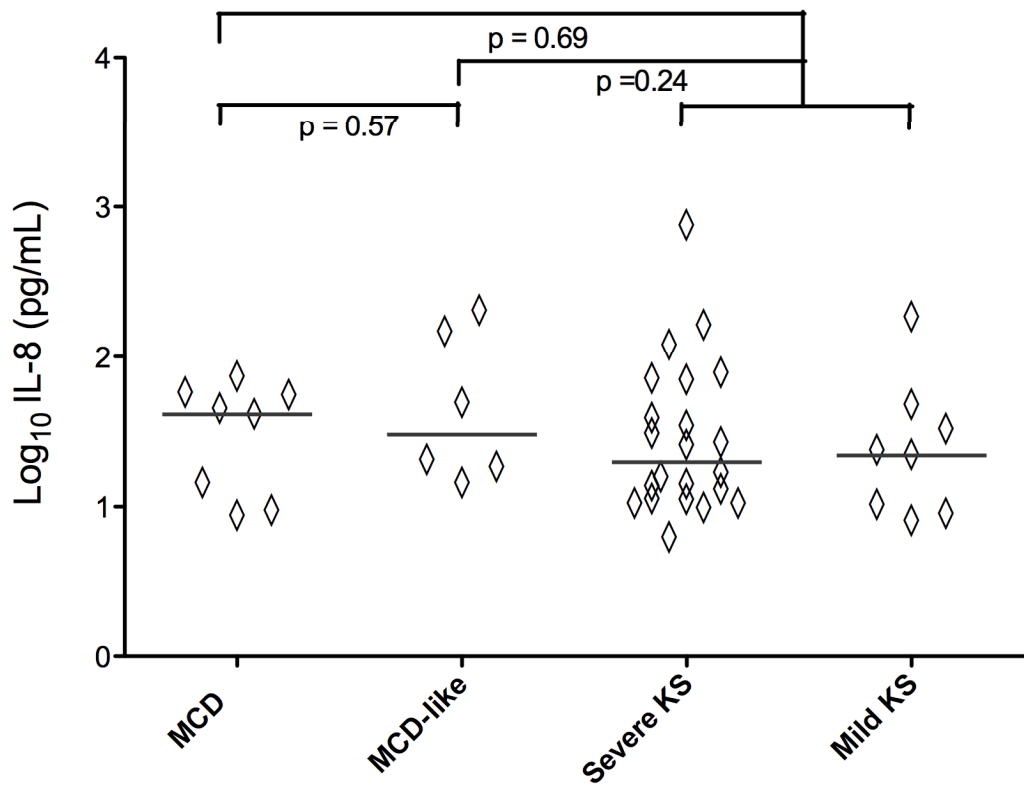

Type of file: figure

Label: 7

Filename: 59827\_figureS3.tif

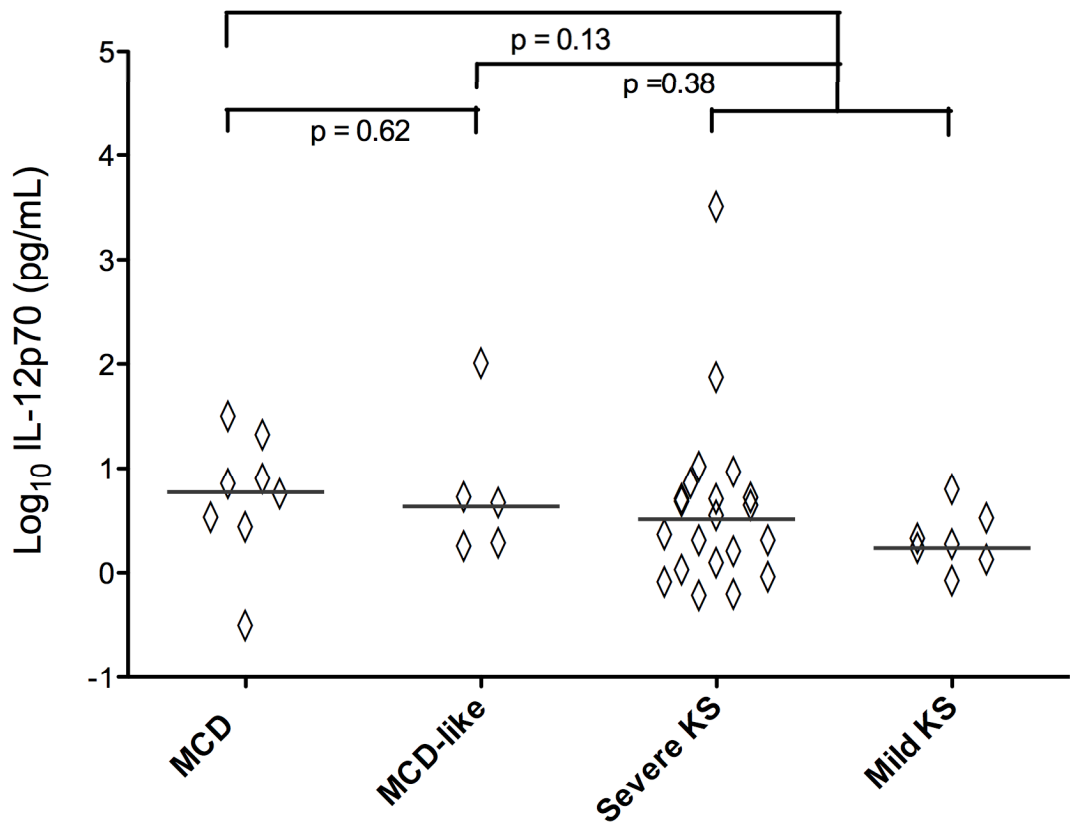

Type of file: figure

Label: 8

Filename: 59827\_figureS4.tif

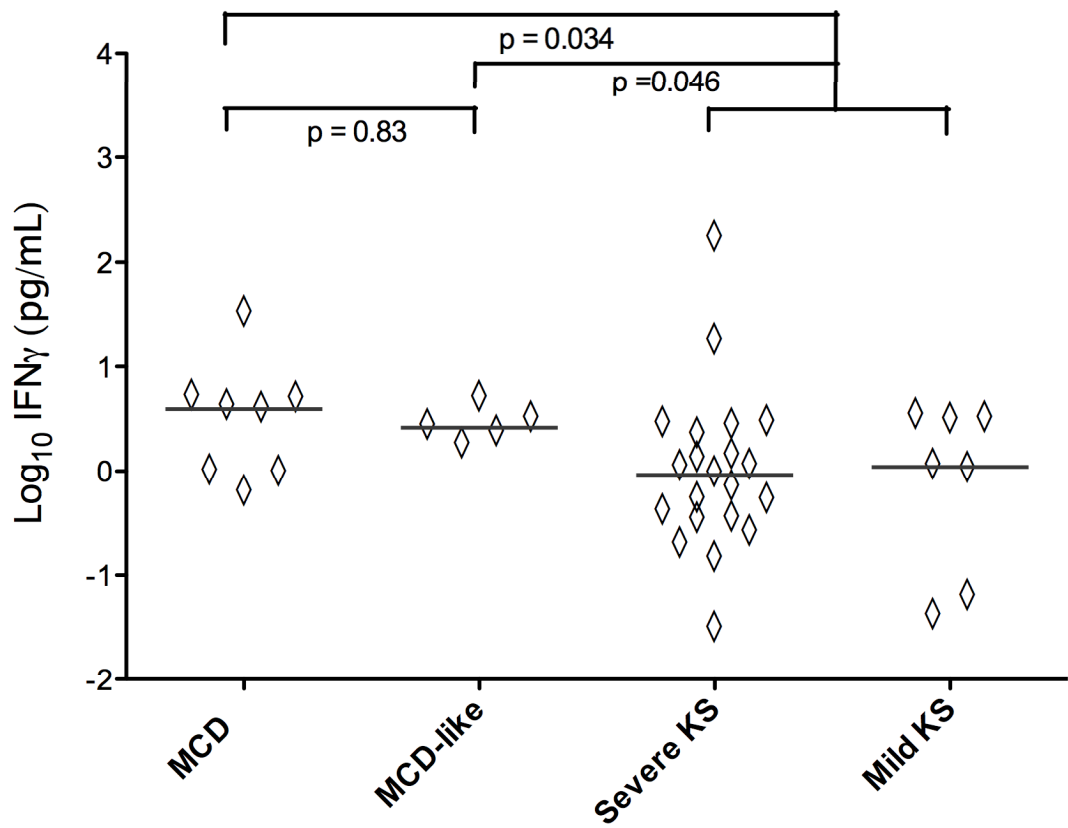



Type of file: figure

Label: 9

Filename: 59827\_figureS5.tif

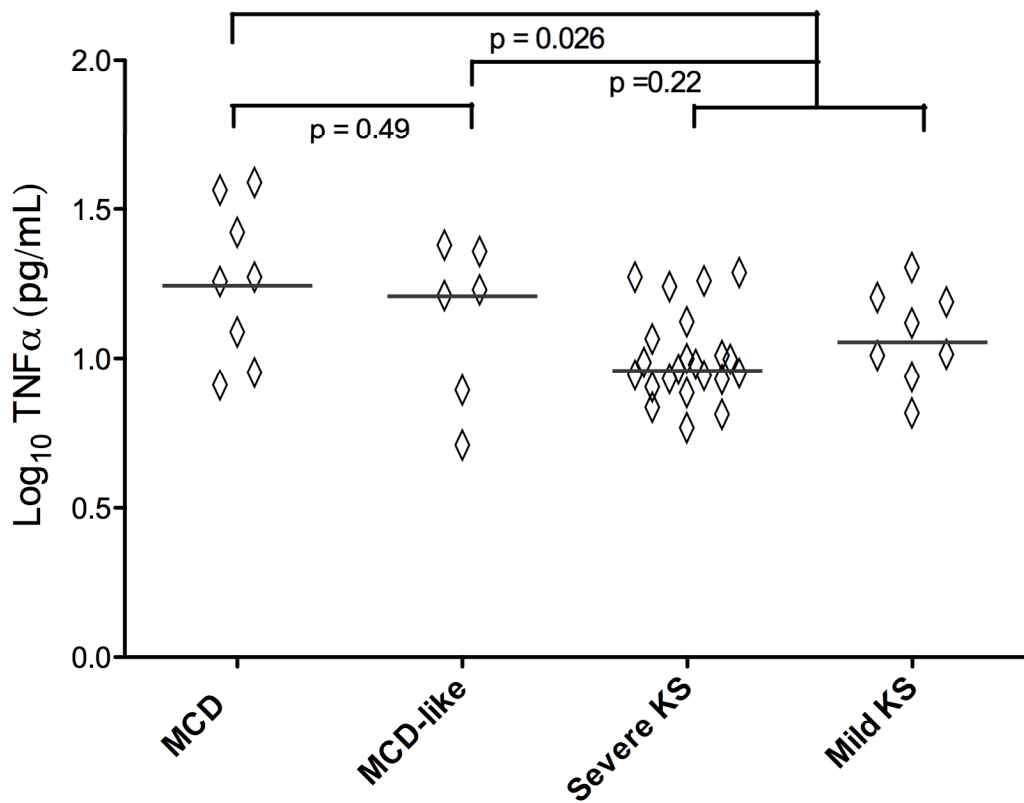

Supplement: NIHMS203571-supplement-supplement_1.pdf [file NIHMS203571-supplement-supplement_1.pdf]
